# Supplementary material for: Comparison of crystal structure and DFT calculations of triferrocenyl trithiophosphite’s conformance
Source: publisher site journal article supplement (doi:10.3762/bjoc.18.157), 2022-10-25
Supplement: Additional file 1 [file 1860-5397-18-157-S1.pdf]

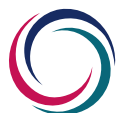

## Supporting Information

for

### Comparison of crystal structure and DFT calculations of triferrocenyl trithiophosphite's conformance

Ruslan P. Shekurov, Mikhail N. Khrizanforov, Ilya A. Bezkishko, Tatiana P. Gerasimova,  
Almaz A. Zagidullin, Daut R. Islamov and Vasili A. Miluykov

*Beilstein J. Org. Chem.* **2022**, *18*, 1499–1504. [doi:10.3762/bjoc.18.157](https://doi.org/10.3762/bjoc.18.157)

## Additional figures

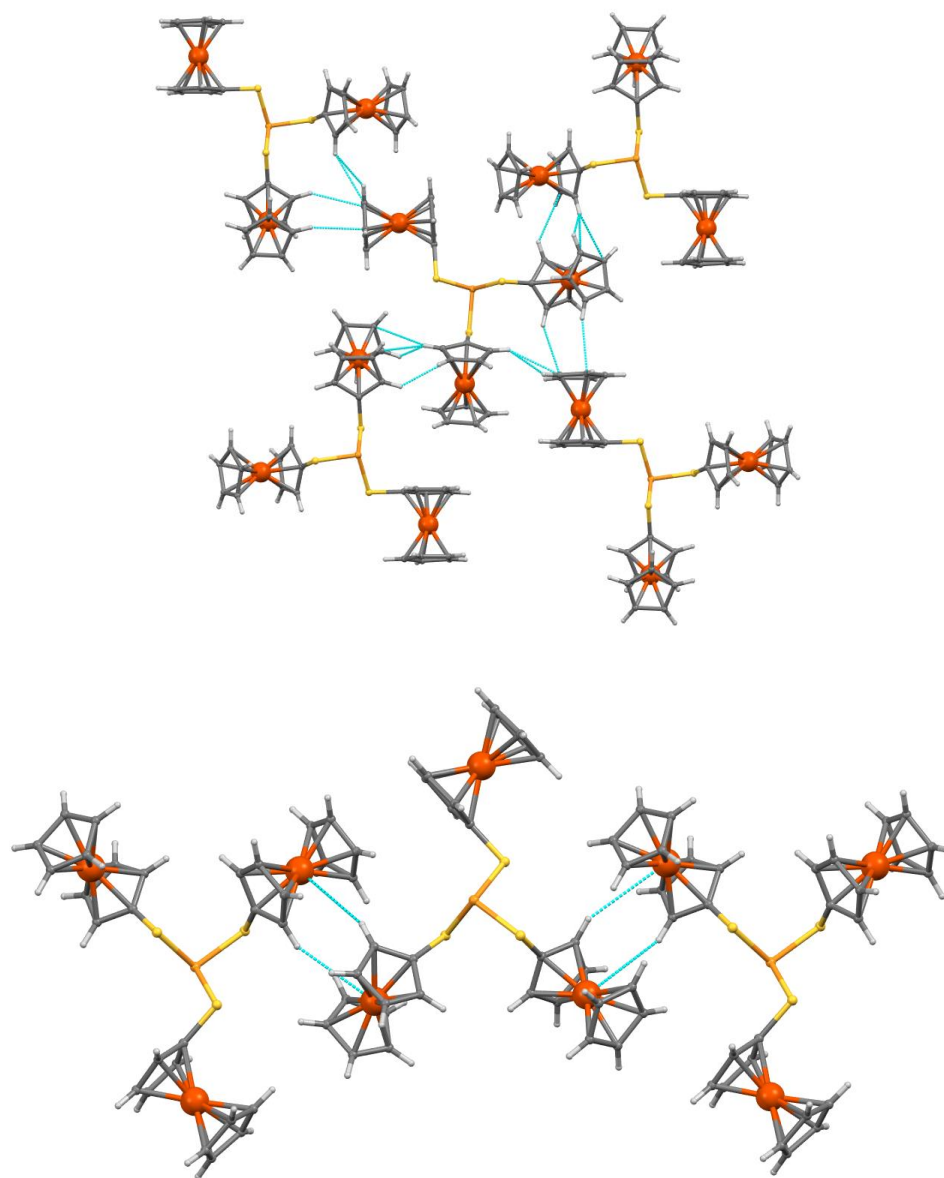

**Figure S1:** The crystal structure, packing and intermolecular interactions in crystal of (FcS)<sub>3</sub>P.

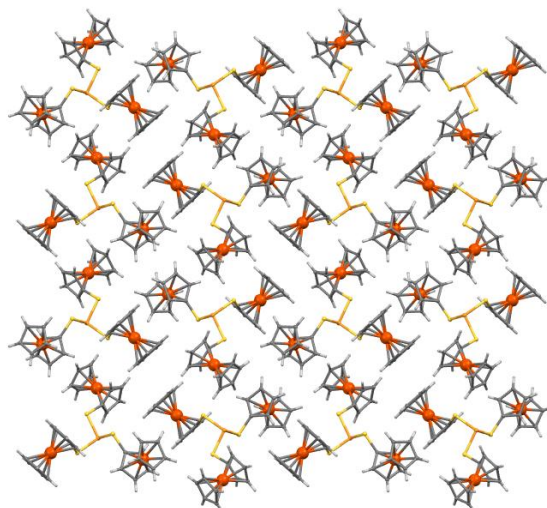

**Figure S2:** View along axis *a* in crystal of (FcS)<sub>3</sub>P.

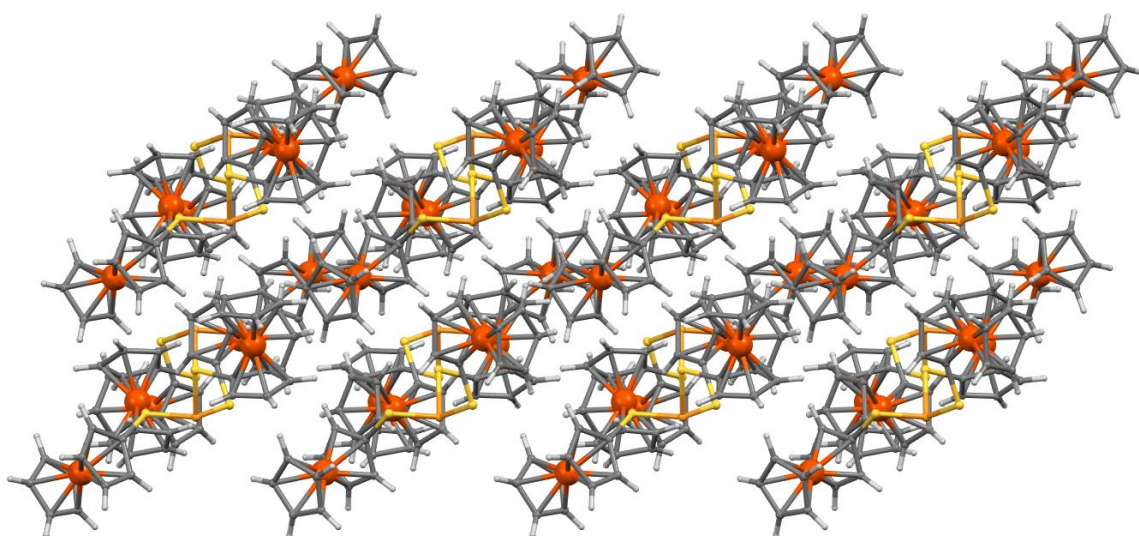

**Figure S3:** View along axis *b* in crystal of (FcS)<sub>3</sub>P.

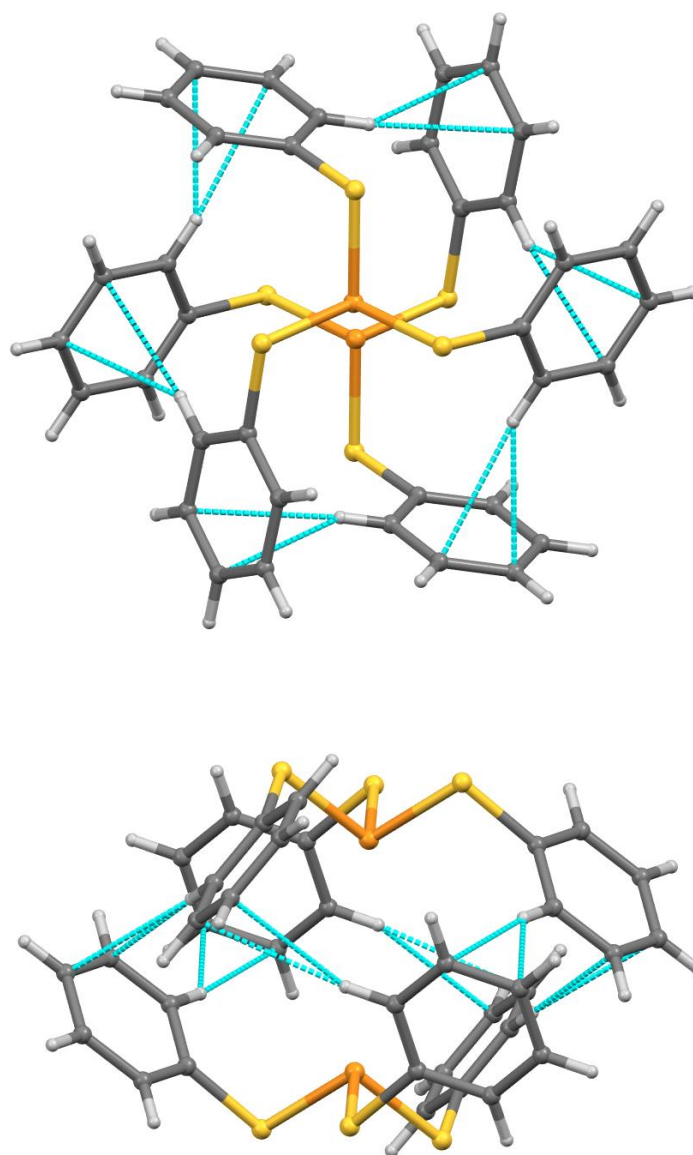

**Figure S4:** The crystal structure, packing and intermolecular interactions in crystal of  $(\text{PhS})_3\text{P}$ .

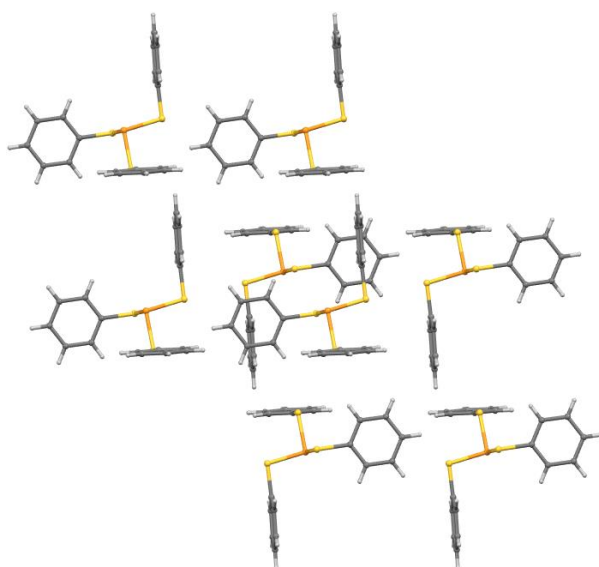

**Figure S5:** View along axis *a* in crystal of (PhS)<sub>3</sub>P.
